# Supplementary material for: Effects of teriparatide and bisphosphonate on spinal fusion procedure: A systematic review and network meta-analysis
Source: PubMed Central journal article supplement (PMC7462270; doi:10.1371/journal.pone.0237566), 2020-09-01
Supplement: pone.0237566.s002.pdf [file pone.0237566.s002.pdf]

---

# **Effects of Teriparatide and Bisphosphonate on Spinal Fusion Procedure:**

**A systematic review and network meta-analysis**

**(Supplementary)**

---

# Index of Supplementary

**Supplementary File 1.** Database and search strategy

**Supplementary File 2.** Risk of bias

**Supplementary File 3.** Forest plot of fusion rate

**Supplementary File 4.** Cumulative probability and SUCRA of fusion rate

**Supplementary File 5.** Inconsistency test for network meta-analysis of fusion rate

**Supplementary File 6.** Publication bias in network meta-analysis of fusion rate

**Supplementary File 7.** Forest plot of ODI

**Supplementary File 8.** Cumulative probability and SUCRA of ODI

**Supplementary File 9.** Inconsistency test for network meta-analysis of ODI

**Supplementary File 10.** Publication bias in network meta-analysis of ODI

**Supplementary File 11.** Forest plot of adverse event

**Supplementary File 12.** Cumulative probability and SUCRA of adverse event

**Supplementary File 13.** Inconsistency test for network meta-analysis of adverse event

**Supplementary File 14.** Publication bias in network meta-analysis of adverse event

**Supplementary 1**  
**Database and search strategy**

# Supplementary 1

## Database and search strategy

| Database                | Search strategy                                                                                                                                                                                                                                                                                                                                                                                                                                                                                                                                                                                                                                                                                                                                                                                                                                                                                                                                                                                                                                                                                                                                                                                                                                                                                                                                                                                     |
|-------------------------|-----------------------------------------------------------------------------------------------------------------------------------------------------------------------------------------------------------------------------------------------------------------------------------------------------------------------------------------------------------------------------------------------------------------------------------------------------------------------------------------------------------------------------------------------------------------------------------------------------------------------------------------------------------------------------------------------------------------------------------------------------------------------------------------------------------------------------------------------------------------------------------------------------------------------------------------------------------------------------------------------------------------------------------------------------------------------------------------------------------------------------------------------------------------------------------------------------------------------------------------------------------------------------------------------------------------------------------------------------------------------------------------------------|
| Primary search strategy | <p>#1. terrosu<br/>           #2. forteo<br/>           #3. teriparatide<br/>           #4. parathyroid hormone<br/>           #5. PTh<br/>           #6. #1 OR #2 OR #3 OR #4 OR #5<br/>           #7. bonviva<br/>           #8. alendronate<br/>           #9. fosamax<br/>           #10. olpadronate<br/>           #11. neridronate<br/>           #12. nericia<br/>           #13. pamidronate<br/>           #14. aredia<br/>           #15. APD<br/>           #16. zometa<br/>           #17. avlasta<br/>           #18. risedronate<br/>           #19. actonel<br/>           #20. boneva<br/>           #21. bisphosphonate<br/>           #22. ibandronic<br/>           #23. disambiguation<br/>           #24. zoledronate<br/>           #25. #7 OR #8 OR #9 OR #10 OR #11 OR #12 OR #13 OR #14 OR #15 OR #16 OR #17 OR #18 OR #19 OR #20 OR #21 OR #22 OR #23 OR #24<br/>           #26. spine fusion<br/>           #27. spinal fusion<br/>           #28. interbody fusion<br/>           #29. inter-body fusion<br/>           #30. spinal arthrodesis<br/>           #31. spine arthrodesis<br/>           #32. spondylosyndesis<br/>           #33. vertebral fusion<br/>           #34. lumbar fusion<br/>           #35. thoracic fusion<br/>           #36. #26 OR #27 OR #28 OR #29 OR #30 OR #31 OR #32 OR #33 OR #34 OR #35<br/>           #37. #6 OR #25 AND #36</p> |

# Supplementary 1

## Database and search strategy

| Database            | Search strategy                                                                                                                                                                                                                                                                                                                                                                                                                                                                                                                                                                                                                                                                                                                                                                                                                                                                                                                                                                                                                                                                                                                                                                                                                                                                                                                                                                                                                                                                                                                                                                                                                                                                                                                                                                                                                                                                                                                                                                                                                                                                                                                                                                                                                                                                                                                                                                                                                                                                                                                                                                                                                                                                                                                                                                                                                                                                                                                                                                                                                                                                                                                                                                                                                                                                                                                                                                                                                                                                                                                                                                                                                                                                                                                                                                                                                                                                                                                                                                                                                                                                                                                                                                                                                                                                                                                                                                                                                                                                                                                                                                                                                                                                                                                                                                                                                                                                                                                                                                                                                                                                                                                                                                                                                                                                                                                                                                                                                                                                                                                                                                                                                                                                                                                                                                                                                                                                                                                                                                                                                                                                                                                                                                                                                                                                                                                                                              |
|---------------------|------------------------------------------------------------------------------------------------------------------------------------------------------------------------------------------------------------------------------------------------------------------------------------------------------------------------------------------------------------------------------------------------------------------------------------------------------------------------------------------------------------------------------------------------------------------------------------------------------------------------------------------------------------------------------------------------------------------------------------------------------------------------------------------------------------------------------------------------------------------------------------------------------------------------------------------------------------------------------------------------------------------------------------------------------------------------------------------------------------------------------------------------------------------------------------------------------------------------------------------------------------------------------------------------------------------------------------------------------------------------------------------------------------------------------------------------------------------------------------------------------------------------------------------------------------------------------------------------------------------------------------------------------------------------------------------------------------------------------------------------------------------------------------------------------------------------------------------------------------------------------------------------------------------------------------------------------------------------------------------------------------------------------------------------------------------------------------------------------------------------------------------------------------------------------------------------------------------------------------------------------------------------------------------------------------------------------------------------------------------------------------------------------------------------------------------------------------------------------------------------------------------------------------------------------------------------------------------------------------------------------------------------------------------------------------------------------------------------------------------------------------------------------------------------------------------------------------------------------------------------------------------------------------------------------------------------------------------------------------------------------------------------------------------------------------------------------------------------------------------------------------------------------------------------------------------------------------------------------------------------------------------------------------------------------------------------------------------------------------------------------------------------------------------------------------------------------------------------------------------------------------------------------------------------------------------------------------------------------------------------------------------------------------------------------------------------------------------------------------------------------------------------------------------------------------------------------------------------------------------------------------------------------------------------------------------------------------------------------------------------------------------------------------------------------------------------------------------------------------------------------------------------------------------------------------------------------------------------------------------------------------------------------------------------------------------------------------------------------------------------------------------------------------------------------------------------------------------------------------------------------------------------------------------------------------------------------------------------------------------------------------------------------------------------------------------------------------------------------------------------------------------------------------------------------------------------------------------------------------------------------------------------------------------------------------------------------------------------------------------------------------------------------------------------------------------------------------------------------------------------------------------------------------------------------------------------------------------------------------------------------------------------------------------------------------------------------------------------------------------------------------------------------------------------------------------------------------------------------------------------------------------------------------------------------------------------------------------------------------------------------------------------------------------------------------------------------------------------------------------------------------------------------------------------------------------------------------------------------------------------------------------------------------------------------------------------------------------------------------------------------------------------------------------------------------------------------------------------------------------------------------------------------------------------------------------------------------------------------------------------------------------------------------------------------------------------------------------------------------------------------|
| Embase<br>(n = 231) | <p>(spine fusion/exp OR 'dorsal spine fusion' OR 'fusion, spine' OR 'spinal fusion' OR 'spine fusion' OR 'spine interbody fusion' OR 'vertebral condensation' OR 'spine arthrodesis'/exp OR 'interbody fusion'/exp OR 'thoracic fusion' OR 'lumbar fusion'/exp OR 'inter-body fusion') AND ('parathyroid hormone[1-34]/exp OR 'bovine parathyroid hormone [1-34]' OR 'chs 13340' OR 'chs13340' OR 'forsteo' OR 'forteo' OR 'ly 333334' OR 'ly333334' OR 'movymia' OR 'parathar' OR 'parathormone (1-34)' OR 'parathormone 1 34' OR 'parathormone 1-34' OR 'parathormone [1-34]' OR 'parathyroid hormone (1-34)' OR 'parathyroid hormone 1 34' OR 'parathyroid hormone 1-34' OR 'parathyroid hormone [1 34]' OR 'parathyroid hormone [1-34]' OR 'parathyroid hormone [1-34] peptide' OR 'parathyroid hormone[1-34]' OR 'pth [1-34]' OR 'sun e3001' OR 'sune3001' OR 'teriparatide' OR 'teriparatide (rdna origin)' OR 'teriparatide acetate' OR 'teriparatide recombinant human' OR 'terrosa' OR 'bisphosphonic acid derivative'/exp OR 'biphosphonate' OR 'biphosphonates' OR 'bisphosphonate' OR 'bisphosphonate derivative' OR 'bisphosphonates' OR 'bisphosphonic acid derivative' OR 'diphosphonate derivative' OR 'diphosphonate series' OR 'diphosphonates' OR 'diphosphonic acid derivative' OR 'risedronic acid'/exp OR '1 hydroxy 2 (3 pyridinyl) ethylidene 1, 1 bisphosphonic acid' OR '1 hydroxy 2 (3 pyridyl) 1, 1 ethanebisphosphonic acid' OR '1 hydroxy 2 (3 pyridyl) ethylidene 1, 1 bisphosphonate' OR '1 hydroxy 2 (3 pyridyl) ethylidene 1, 1 bisphosphonic acid' OR '2 (3 pyridinyl) 1 hydroxyethylidene 1, 1 bisphosphonic acid' OR 'acrel' OR 'actonel' OR 'actonel once a week' OR 'atelia' OR 'benet' OR 'ne 58095' OR 'ne58095' OR 'optinate' OR 'ribastamin' OR 'risedronate' OR 'risedronate monosodium hemipentahydrate' OR 'risedronate sodium' OR 'risedronic acid' OR 'ibandronic acid'/exp OR 'olpadronic acid'/exp OR '1 hydroxy 3 dimethylamino 1, 1 propanediphosphonate' OR '1 hydroxy 3 dimethylaminopropane 1, 1 diphosphonate' OR '3 dimethylamino 1 hydroxy 1, 1 propanediphosphonic acid' OR '3 dimethylamino 1 hydroxypropylidene 1, 1 diphosphonate' OR 'hydroxydimethylaminopropylene diphosphonic acid' OR 'ig 8801' OR 'ig8801' OR 'olpadronate' OR 'olpadronate sodium' OR 'olpadronic acid' OR 'olpadronic acid sodium salt' OR 'sodium olpadronate' OR 'zoledronic acid'/exp OR '1 hydroxy 2 (1 imidazolyl) 1, 1 ethanebisphosphonic acid' OR '1 hydroxy 2 (1h imidazol 1 yl) ethylidenebisphosphonic acid' OR '1 hydroxy 2 (imidazol 1 yl) ethylidenebisphosphonic acid' OR 'aclasta' OR 'cgp 42446' OR 'cgp 42446a' OR 'cgp42446' OR 'cgp42446a' OR 'orazol' OR 'reclast' OR 'zol 446' OR 'zol446' OR 'zoledronate' OR 'zoledronate disodium' OR 'zoledronate trisodium' OR 'zoledronic acid' OR 'zoledronic acid disodium salt hydrate' OR 'zoledronic acid hydrate' OR 'zoledronic acid monohydrate' OR 'zomera' OR 'zometa' OR 'alendronic acid'/exp OR '4 amino 1 hydroxy 1, 1 butanebisphosphonic acid' OR '4 amino 1 hydroxy 1, 1 butanediphosphonic acid' OR '4 amino 1 hydroxybutane 1, 1 diphosphonate' OR '4 amino 1 hydroxybutylidene 1, 1 bisphosphonate' OR '4 amino 1 hydroxybutylidene 1, 1 bisphosphonic acid' OR '4 amino 1 hydroxybutylidene 1, 1 diphosphonate' OR '4 amino 1 hydroxybutylidene 1, 1 diphosphonic acid' OR 'alenate' OR 'alend' OR 'alendronate' OR 'alendronate sodium' OR 'alendronate sodium trihydrate' OR 'alendronic acid' OR 'alendros' OR 'alovell' OR 'arendal' OR 'bifemelan' OR 'bifosa' OR 'binosto' OR 'bonapex' OR 'defixal' OR 'dronal' OR 'endronax' OR 'eucalen' OR 'fixopan' OR 'fosalan' OR 'fosamax' OR 'fosmin' OR 'fosval' OR 'marvil' OR 'maxibone' OR 'maxibone 70' OR 'mk 0217' OR 'mk 217' OR 'mk0217' OR 'mk217' OR 'neobon' OR 'oncalst' OR 'onclast' OR 'osdron' OR 'osdronat' OR 'oseotenk' OR 'osficar' OR 'oslene' OR 'osteofar' OR 'osteofos' OR 'osteopor' OR 'osteosan' OR 'osteovan' OR 'osticalcin' OR 'porosal' OR 'sodium alendronate' OR 'teiroc' OR 'tibolene' OR 'voroste' OR 'neridronic acid'/exp OR '6 amino 1 hydroxy 1, 1 hexanebisphosphonic acid' OR '6 amino 1 hydroxy 1, 1 hexanediphosphonic acid' OR '6 amino 1 hydroxyhexane 1, 1 diphosphonic acid' OR '6 amino 1 hydroxyhexylidene 1, 1 bisphosphonate' OR '6 amino 1 hydroxyhexylidene 1, 1 bisphosphonic acid' OR '6 amino 1 hydroxyhexylidene 1, 1 diphosphonate' OR '6 amino 1 hydroxyhexylidene 1, 1 diphosphonic acid' OR 'neridronate' OR 'neridronate sodium' OR 'neridronic acid' OR 'nerixia' OR 'pamidronic acid'/exp OR '(3 amino 1 hydroxypropylidene) 1, 1 diphosphonic acid' OR '1 hydroxy 3 aminopropylidene 1, 1 bisphosphonate' OR '3 amino 1 hydroxy 1, 1 propanediphosphonic acid' OR '3 amino 1 hydroxypropane 1, 1 diphosphonate' OR '3 amino 1 hydroxypropane 1, 1 diphosphonic acid' OR '3 amino 1 hydroxypropylidene 1, 1 bisphosphonate' OR '3 amino 1 hydroxypropylidene 1, 1 bisphosphonic acid' OR '3 amino 1 hydroxypropylidene 1, 1 diphosphonate' OR '3 amino 1 hydroxypropylidene 1, 1 diphosphonic acid' OR '3 amino 1 hydroxypropylidene 1, 1 diphosphonate' OR '3 amino 1, 1 diphosphonopropanol' OR '3 aminohydroxypropylidene 1, 1 diphosphonate' OR '3 hydroxy 3, 3 diphosphonopropylamine' OR 'amidronate' OR 'aminohydroxypropanediphosphonic acid' OR 'aminohydroxypropyldiphosphonate' OR 'aminohydroxypropylidene 1, 1 diphosphonate' OR 'aminohydroxypropylidene diphosphonate' OR 'aminohydroxypropylidenebisphonic acid' OR 'aminohydroxypropylidenebisphosphonate' OR 'aminohydroxypropylidenediphosphonate' OR 'aminomux' OR 'apd' OR 'aredia' OR 'aredronet' OR 'cgp 23339' OR 'cgp 23339a' OR 'cgp23339' OR 'cgp23339a' OR 'disodium 3 amino 1 hydroxypropylidene 1, 1 bisphosphonate' OR 'disodium 3 amino 1 hydroxypropylidene 1, 1 diphosphonate' OR 'disodium pamidronate' OR 'ostepam' OR 'pamidrin' OR 'pamidro cell' OR 'pamidrocell' OR 'pamidrocell' OR 'pamidromyl' OR 'pamidronat' OR 'pamidronate' OR 'pamidronate disodium' OR 'pamidronate disodium novaplus' OR 'pamidronate sodium' OR 'pamidronato' OR 'pamidronic acid' OR 'pamifos' OR 'pamimed' OR 'paminject' OR 'pamipro' OR 'pamired' OR 'pamisol' OR 'pamitor' OR 'panolin' OR 'panorin' OR 'ribodronat' OR 'sodium pamidronate' OR 'texpami')</p> |
| PubMed<br>(n = 151) | <p>((terrosu OR forteo OR teriparatide OR parathyroid hormone OR PTH) OR (bonviva OR alendronate OR fosamax OR olpadronate OR neridronate OR nericia OR pamidronate OR aredia OR APD OR zometa OR avlasta OR risedronate OR actonel OR boneva OR bisphosphonate OR ibandronic OR disambiguation OR zoledronate)) AND (spine fusion OR spinal fusion OR interbody fusion OR inter-body fusion OR spinal arthrodesis OR spine arthrodesis OR spondylosyndesis OR vertebral fusion OR lumbar fusion OR thoracic fusion)</p>                                                                                                                                                                                                                                                                                                                                                                                                                                                                                                                                                                                                                                                                                                                                                                                                                                                                                                                                                                                                                                                                                                                                                                                                                                                                                                                                                                                                                                                                                                                                                                                                                                                                                                                                                                                                                                                                                                                                                                                                                                                                                                                                                                                                                                                                                                                                                                                                                                                                                                                                                                                                                                                                                                                                                                                                                                                                                                                                                                                                                                                                                                                                                                                                                                                                                                                                                                                                                                                                                                                                                                                                                                                                                                                                                                                                                                                                                                                                                                                                                                                                                                                                                                                                                                                                                                                                                                                                                                                                                                                                                                                                                                                                                                                                                                                                                                                                                                                                                                                                                                                                                                                                                                                                                                                                                                                                                                                                                                                                                                                                                                                                                                                                                                                                                                                                                                                     |

**Supplementary 2**  
**Risk of bias**

## Supplementary 2

### Risk of bias

#### Risk of Bias Tool for randomized clinical trials our synthesis

| Study     | 1        | 2         | 3         | 4         | 5        | 6        | 7         |
|-----------|----------|-----------|-----------|-----------|----------|----------|-----------|
| Jespersen | Low risk | Low risk  | Low risk  | Low risk  | Low risk | Low risk | High risk |
| Sheng     | Unclear  | Unclear   | High risk | High risk | Low risk | Unclear  | Unclear   |
| Ide       | Unclear  | Unclear   | High risk | Low risk  | Low risk | Low risk | Low risk  |
| Ebata     | Low risk | Low risk  | Low risk  | Low risk  | Low risk | Low risk | High risk |
| Chen      | Unclear  | Unclear   | Unclear   | Unclear   | Low risk | Low risk | Low risk  |
| Ohtori    | Unclear  | Unclear   | High risk | High risk | Low risk | Low risk | Low risk  |
| Li        | Low risk | Low risk  | Low risk  | Low risk  | Low risk | Low risk | Low risk  |
| Nagahama  | Unclear  | High risk | Low risk  | Low risk  | Low risk | Low risk | High risk |

1 sequence generation; 2 allocation concealment; 3 blinding of participants and personnel; 4 blinding of outcome assessment; 5 incomplete outcome data; 6 selective reporting; 7 other bias.

#### Newcastle-Ottawa Quality Assessment Scale for prospective studies in our synthesis

| Study | 1-1 | 1-2 | 1-3 | 1-4 | 2   | 3-1 | 3-2 | 3-3 |
|-------|-----|-----|-----|-----|-----|-----|-----|-----|
| Seki  | ★   | ★   | ★   | ★   | ★★★ | ★   | ★   | ★   |
| Cho   | ★   | ★   | ★   | ★   | ★★★ | ★   | ★   | ★   |
| Yagi  | ★   | ★   | ★   | ★   | ★★★ | ★   | ★   | ★   |

1-1 Representativeness of the exposed cohort; 1-2 Selection of the non-exposed cohort; 1-3 Ascertainment of exposure; 1-4 Demonstration that outcome of interest was not present at start of study; 2 Comparability of cohorts on the basis of the design or analysis controlled for confounders; 3-1 Assessment of outcome; 3-2 Was follow-up long enough for outcomes to occur; 3-3 Adequacy of follow-up of cohorts.

**Supplementary 3 to 6**  
**Outcomes of fusion rate**



# Supplementary 3

## Forest plot of fusion rate

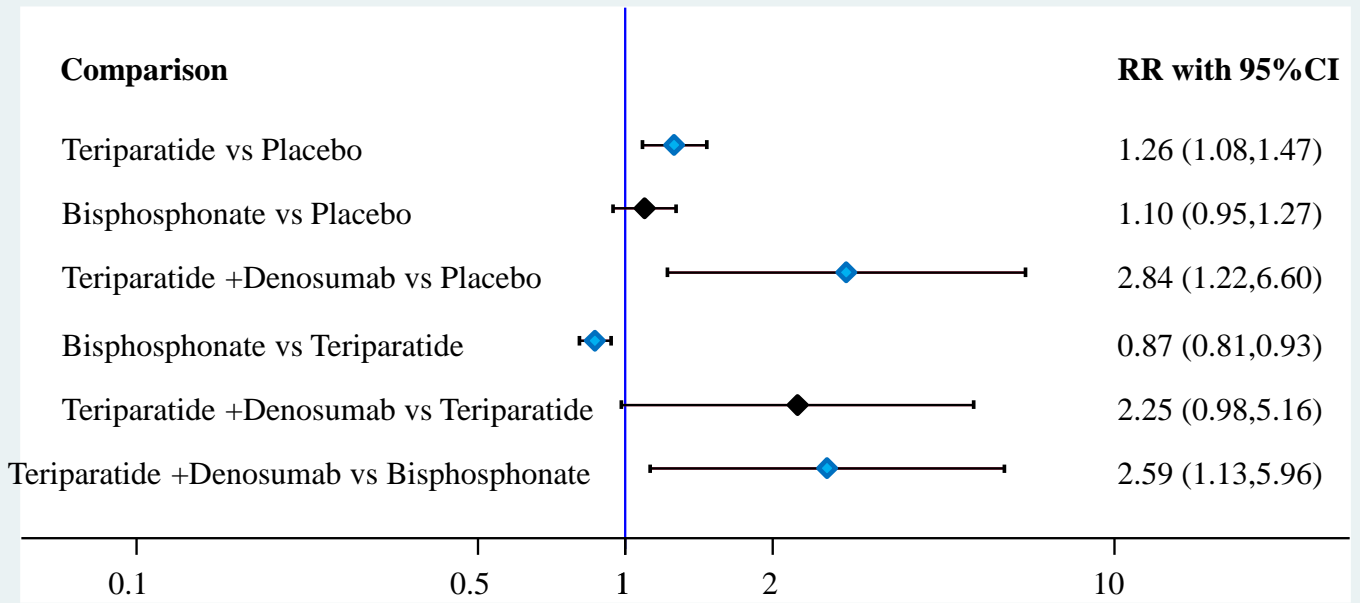

# Supplementary 4

## Cumulative probability rank and SUCRA of fusion rate

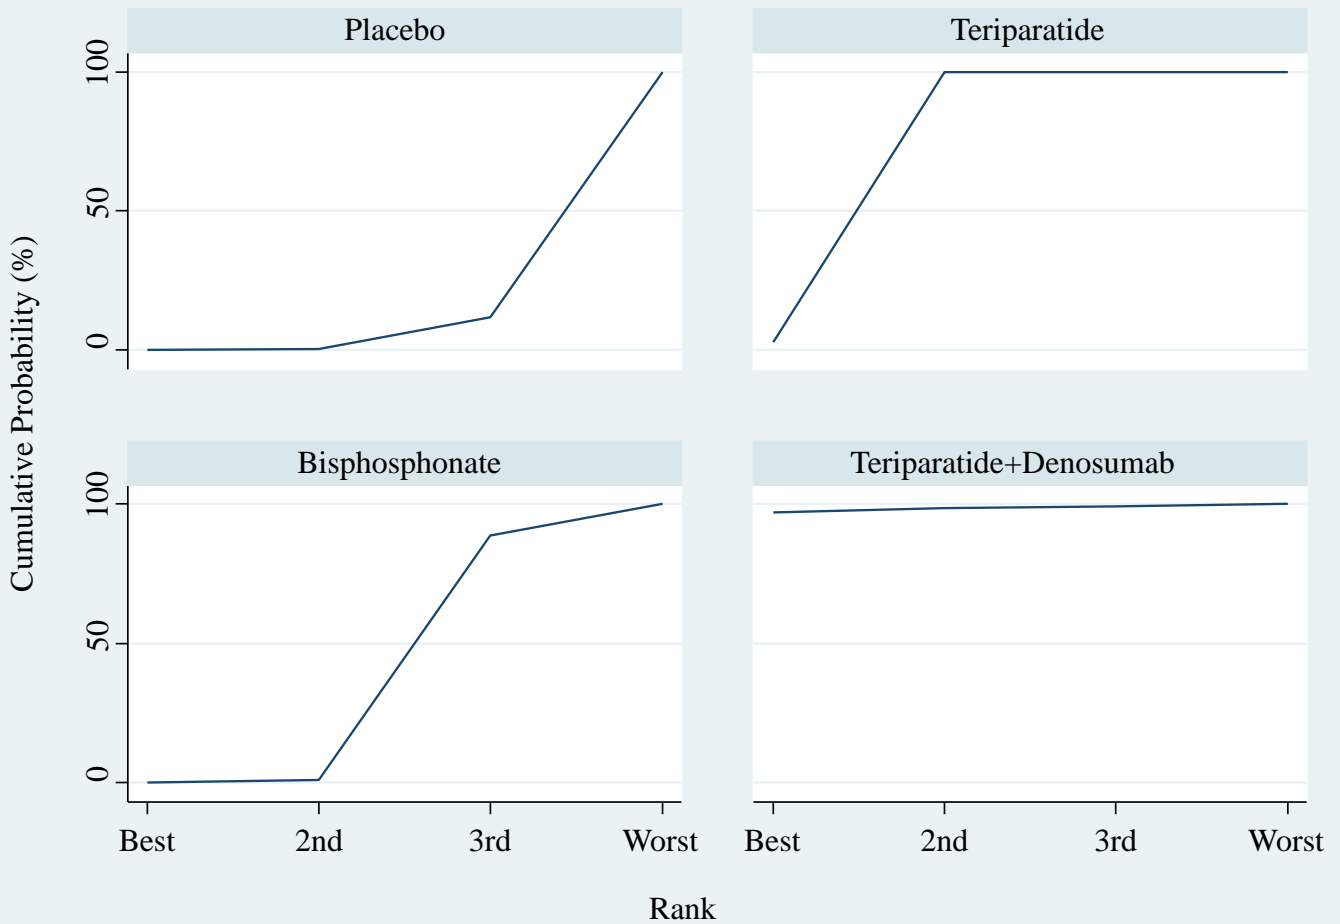

```
. sucra prob*, labels(Placebo Teriparatide Bisphosphonate
Teriparatide+Denosumab)
```

| Treatment              | SUCRA | PrBest | MeanRank |
|------------------------|-------|--------|----------|
| Placebo                | 4.1   | 0.0    | 3.9      |
| Teriparatide           | 67.5  | 2.8    | 2.0      |
| Bisphosphonate         | 30.0  | 0.0    | 3.1      |
| Teriparatide+Denosumab | 98.4  | 97.2   | 1.0      |

# Supplementary 5

## Inconsistency test for network meta-analysis of fusion rate

. network meta i, luades

Command is: mvmeta \_y \_S , bscovariance(exch 0.5)

longparm suppress(uv mm) eq(\_y\_C: groupB) vars(\_y\_B \_y\_C \_y\_D)

initial: log likelihood = -18.133634  
rescale: log likelihood = -15.184222  
rescale eq: log likelihood = -13.301489  
Iteration 0: log likelihood = -13.301489  
Iteration 1: log likelihood = -13.097662  
Iteration 2: log likelihood = -13.094284  
Iteration 3: log likelihood = -13.094264  
Iteration 4: log likelihood = -13.094264

Multivariate meta-analysis

Variance-covariance matrix = proportional .5\*I(3)+.5\*J(3,3,1)

Method = reml Number of dimensions = 3

Restricted log likelihood = -13.094264 Number of observations = 9

|        | Coef.     | Std. Err. | z     | P> z  | [95% Conf. Interval] |          |
|--------|-----------|-----------|-------|-------|----------------------|----------|
| -----  |           |           |       |       |                      |          |
| _y_B   |           |           |       |       |                      |          |
| _cons  | .1492188  | .1291635  | 1.16  | 0.248 | -.103937             | .4023746 |
| -----  |           |           |       |       |                      |          |
| _y_C   |           |           |       |       |                      |          |
| groupB | -.1647182 | .208889   | -0.79 | 0.430 | -.5741332            | .2446968 |
| _cons  | .144175   | .103972   | 1.39  | 0.166 | -.0596065            | .3479564 |
| -----  |           |           |       |       |                      |          |
| _y_D   |           |           |       |       |                      |          |
| _cons  | .9600011  | .4479312  | 2.14  | 0.032 | .0820721             | 1.83793  |
| -----  |           |           |       |       |                      |          |

Estimated between-studies SDs and correlation matrix:

|      | SD       | _y_B | _y_C | _y_D |
|------|----------|------|------|------|
| _y_B | .0686408 | 1    | .    | .    |
| _y_C | .0686408 | .5   | 1    | .    |
| _y_D | .0686408 | .5   | .5   | 1    |

Testing for inconsistency:

( 1) [\_y\_C]groupB = 0

chi2( 1) = 0.62  
Prob > chi2 = 0.4304

# Supplementary 6

## Publication bias in network meta-analysis of fusion rate

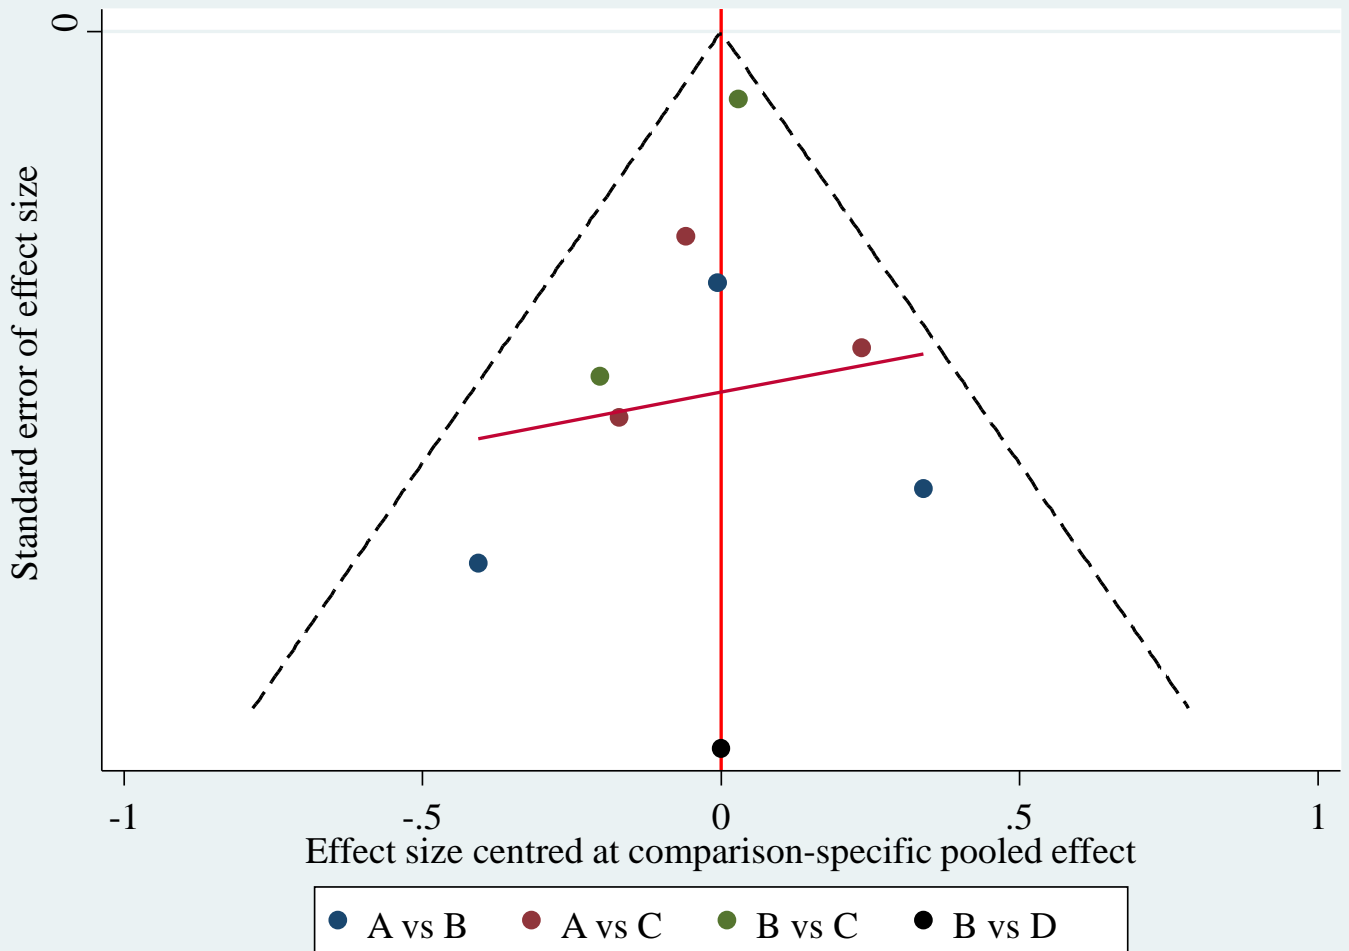

A, Placebo; B, Teriparatide; C, Bisphosphonate; D Teriparatide+Denosumab

Egger's test for small-study effects:  
 Regress standard normal deviate of intervention  
 effect estimate against its standard error

Number of studies = 9                      Root MSE = .967

| Std_Eff | Coef.     | Std. Err. | t     | P> t  | [95% Conf. Interval] |
|---------|-----------|-----------|-------|-------|----------------------|
| slope   | .0390632  | .0488657  | 0.80  | 0.450 | -.0764858 .1546121   |
| bias    | -.3122612 | .4741488  | -0.66 | 0.531 | -1.433445 .8089226   |

Test of H0: no small-study effects                      P = 0.531

**Supplementary 7 to 10**  
**Outcomes of Oswestry Disability Index (ODI)**

# Supplementary 7

## Forest plot of ODI

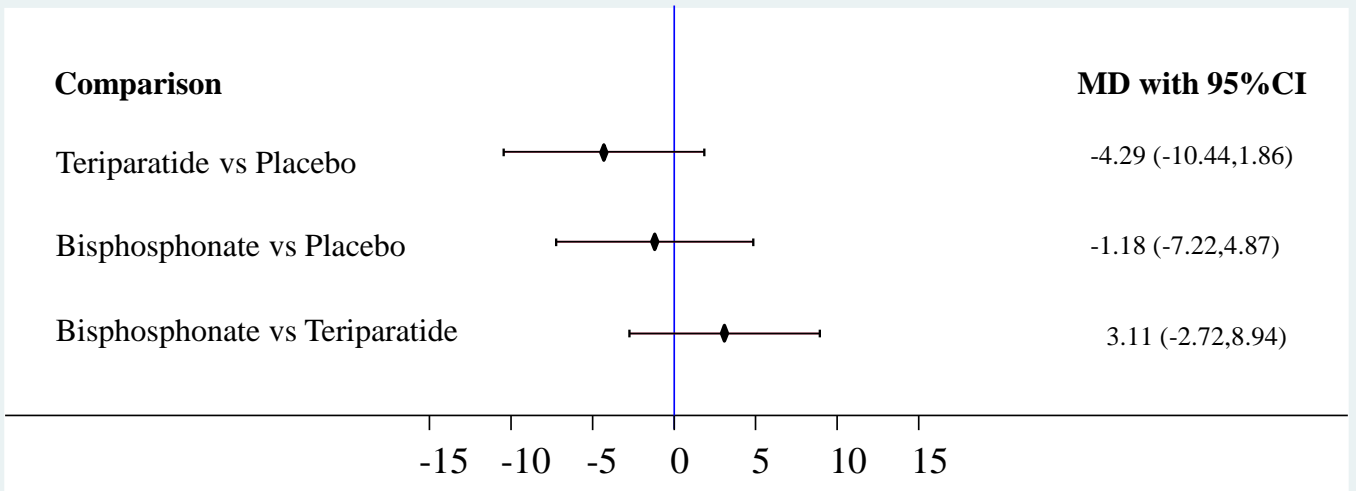

# Supplementary 8

## Cumulative probability rank and SUCRA of ODI

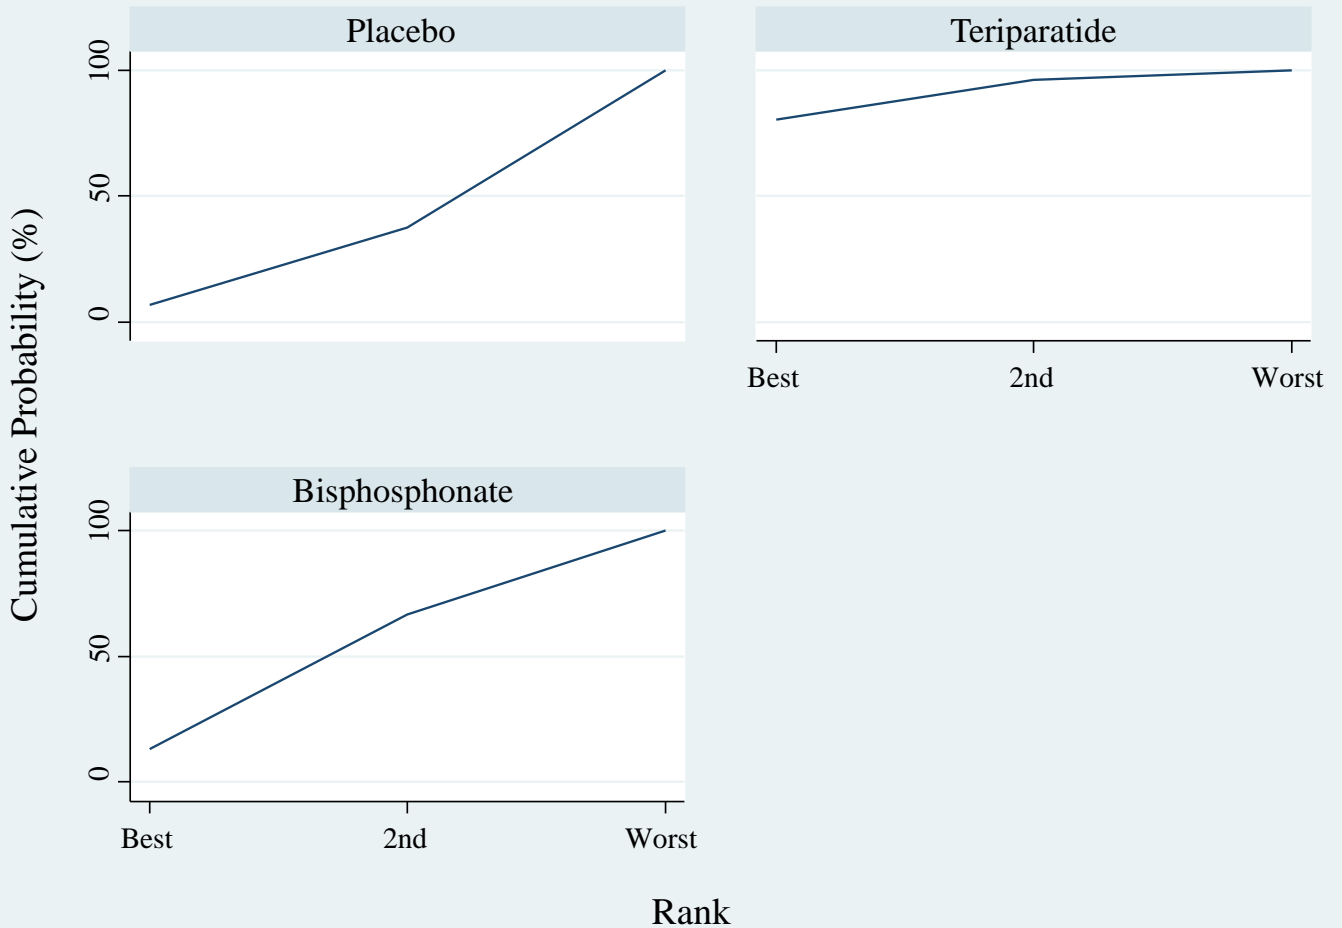

```
. sucra prob*, labels(Placebo Teriparatide Bisphosphonate)
```

| Treatment      | SUCRA | PrBest | MeanRank |
|----------------|-------|--------|----------|
| Placebo        | 22.0  | 6.7    | 2.6      |
| Teriparatide   | 88.2  | 80.4   | 1.2      |
| Bisphosphonate | 39.8  | 13.0   | 2.2      |

# Supplementary 9

## Inconsistency test for network meta-analysis of ODI

. network meta i, luades

Command is: mvmeta \_y \_S , bscovariance(exch 0.5) longparm suppress(uv mm) eq(\_y\_C: groupB) vars(\_y\_B \_y\_C)

initial: log likelihood = -25.562926  
 rescale: log likelihood = -25.562926  
 rescale eq: log likelihood = -23.646535  
 Iteration 0: log likelihood = -23.646535  
 Iteration 1: log likelihood = -23.546692  
 Iteration 2: log likelihood = -23.530799  
 Iteration 3: log likelihood = -23.530692  
 Iteration 4: log likelihood = -23.530692

Multivariate meta-analysis

Variance-covariance matrix = proportional .5\*I(2)+.5\*J(2,2,1)

Method = reml Number of dimensions = 2

Restricted log likelihood = -23.530692 Number of observations = 5

|        | Coef.     | Std. Err. | z     | P> z  | [95% Conf. Interval] |          |
|--------|-----------|-----------|-------|-------|----------------------|----------|
| -----  |           |           |       |       |                      |          |
| _y_B   |           |           |       |       |                      |          |
| _cons  | -2.283964 | 3.020782  | -0.76 | 0.450 | -8.204589            | 3.63666  |
| -----  |           |           |       |       |                      |          |
| _y_C   |           |           |       |       |                      |          |
| groupB | 7.696847  | 5.163088  | 1.49  | 0.136 | -2.42262             | 17.81631 |
| _cons  | -3.022839 | 2.897123  | -1.04 | 0.297 | -8.701095            | 2.655418 |
| -----  |           |           |       |       |                      |          |

Estimated between-studies SDs and correlation matrix:

|      | SD        | _y_B | _y_C |
|------|-----------|------|------|
| _y_B | 3.7862697 | 1    | .    |
| _y_C | 3.7862697 | .5   | 1    |

Testing for inconsistency:

( 1) [\_y\_C]groupB = 0

chi2( 1) = 2.22  
 Prob > chi2 = 0.1360



# Supplementary 10

## Publication bias in network meta-analysis of ODI

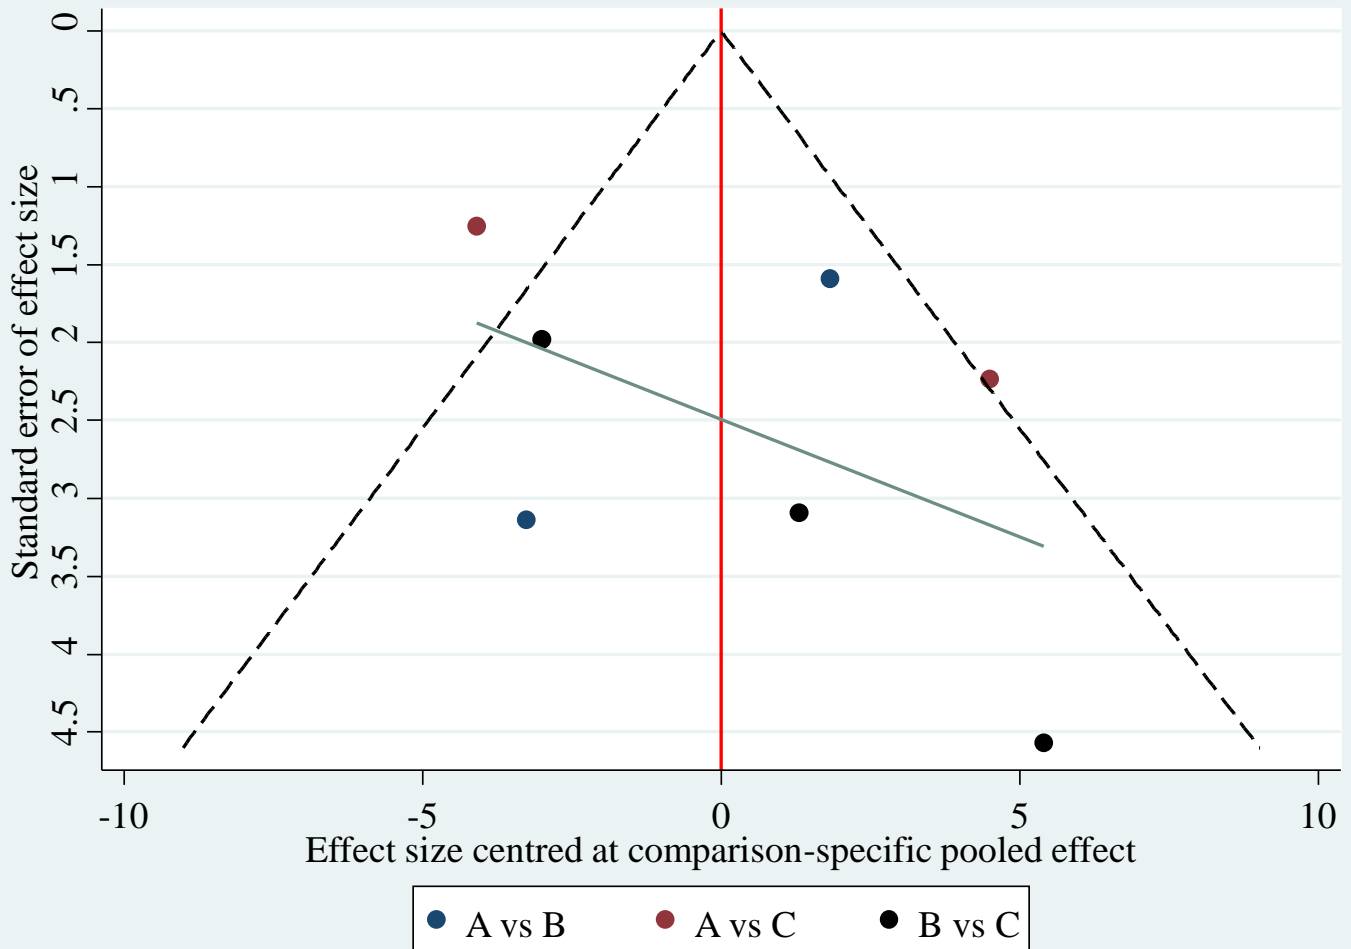

A, Placebo; B, Teriparatide; C, Bisphosphonate

Egger's test for small-study effects:  
 Regress standard normal deviate of intervention  
 effect estimate against its standard error

Number of studies = 7

Root MSE = 1.729

| Std_Eff | Coef.     | Std. Err. | t     | P> t  | [95% Conf. Interval] |
|---------|-----------|-----------|-------|-------|----------------------|
| slope   | -4.956138 | 3.513476  | -1.41 | 0.217 | -13.98781 4.075539   |
| bias    | 2.143211  | 1.752784  | 1.22  | 0.276 | -2.362464 6.648886   |

Test of H0: no small-study effects

P = 0.531

**Supplementary 11 to 14**  
**Outcomes of adverse event**

# Supplementary 11

## Forest plot of adverse event

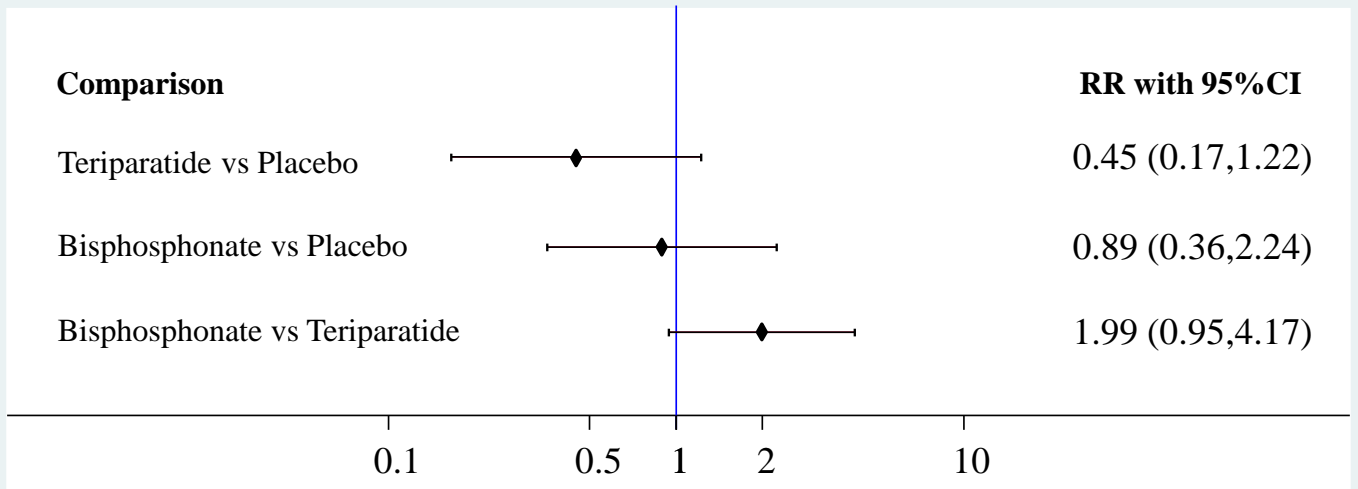

# Supplementary 12

## Cumulative probability rank and SUCRA of adverse event

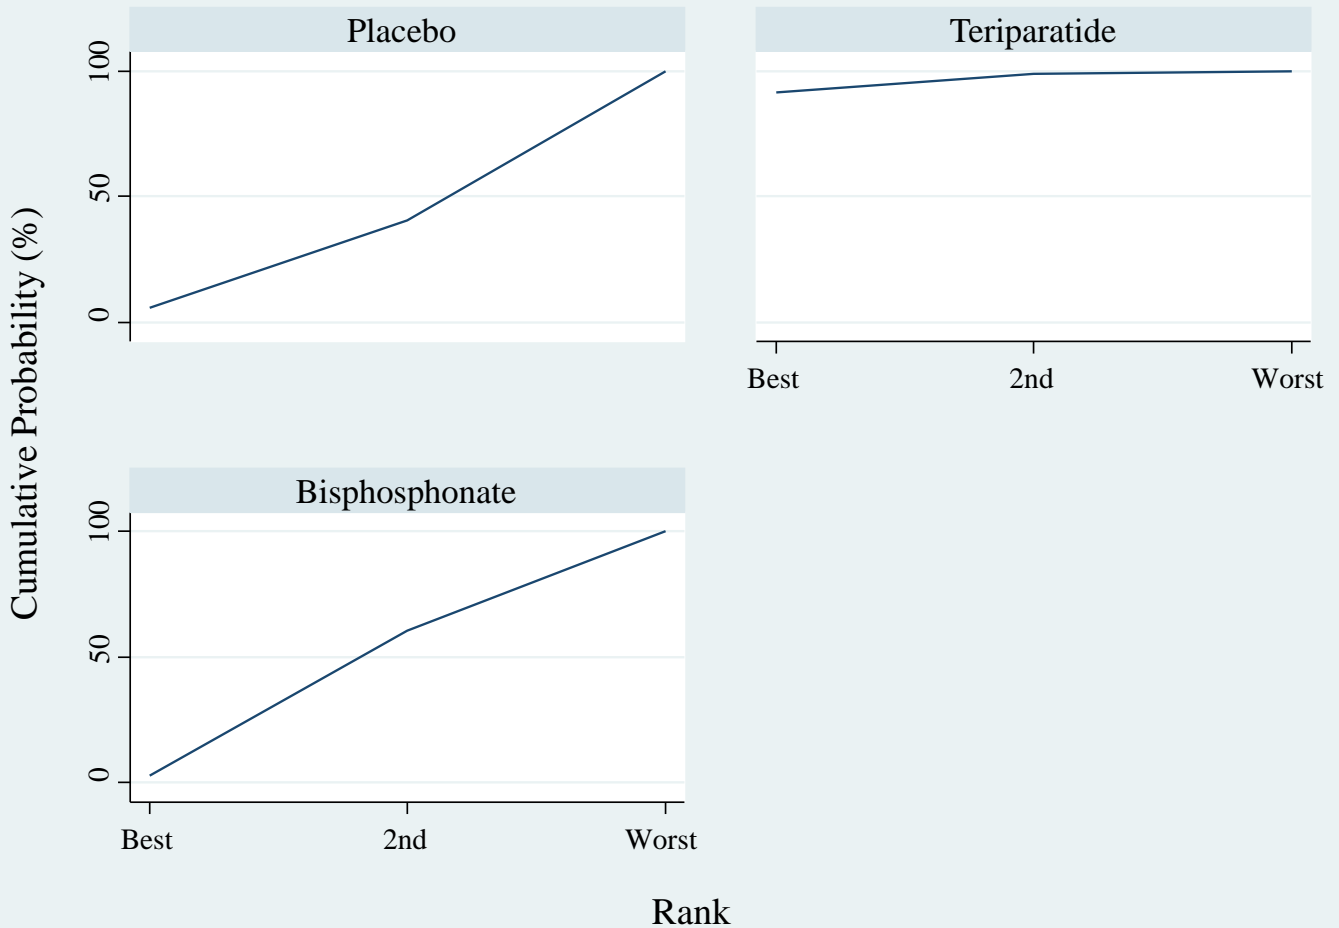

```
. sucra prob*, labels(Placebo Teriparatide Bisphosphonate)
```

| Treatment      | SUCRA | PrBest | MeanRank |
|----------------|-------|--------|----------|
| Placebo        | 23.2  | 5.8    | 2.5      |
| Teriparatide   | 95.0  | 91.2   | 1.1      |
| Bisphosphonate | 31.8  | 3.0    | 2.4      |

# Supplementary 13

## Inconsistency test for network meta-analysis of adverse event

. network meta i, luades

Command is: mvmeta \_y \_S , bscovariance(exch 0.5) longparm suppress(uv mm) eq(\_y\_C: groupB) vars(\_y\_B \_y\_C)

initial: log likelihood = -13.729116  
rescale: log likelihood = -13.670617  
rescale eq: log likelihood = -13.221721  
Iteration 0: log likelihood = -13.221721  
Iteration 1: log likelihood = -13.20887  
Iteration 2: log likelihood = -13.208867  
Iteration 3: log likelihood = -13.208867

Multivariate meta-analysis

Variance-covariance matrix = proportional .5\*I(2)+.5\*J(2,2,1)

Method = reml Number of dimensions = 2

Restricted log likelihood = -13.208867 Number of observations = 4

|        | Coef.     | Std. Err. | z     | P> z  | [95% Conf. Interval] |          |
|--------|-----------|-----------|-------|-------|----------------------|----------|
| -----  |           |           |       |       |                      |          |
| _y_B   |           |           |       |       |                      |          |
| _cons  | -.8913224 | .6404926  | -1.39 | 0.164 | -2.146665            | .36402   |
| -----  |           |           |       |       |                      |          |
| _y_C   |           |           |       |       |                      |          |
| groupB | -.1987626 | .8375162  | -0.24 | 0.812 | -1.840264            | 1.442739 |
| _cons  | -.0632491 | .5137735  | -0.12 | 0.902 | -1.070227            | .9437284 |
| -----  |           |           |       |       |                      |          |

Estimated between-studies SDs and correlation matrix:

|      | SD        | _y_B | _y_C |
|------|-----------|------|------|
| _y_B | 1.332e-09 | 1    | .    |
| _y_C | 1.332e-09 | .5   | 1    |

Testing for inconsistency:

(1) [\_y\_C]groupB = 0

chi2( 1) = 0.06  
Prob > chi2 = 0.8124

# Supplementary 14

## Publication bias in network meta-analysis of adverse event

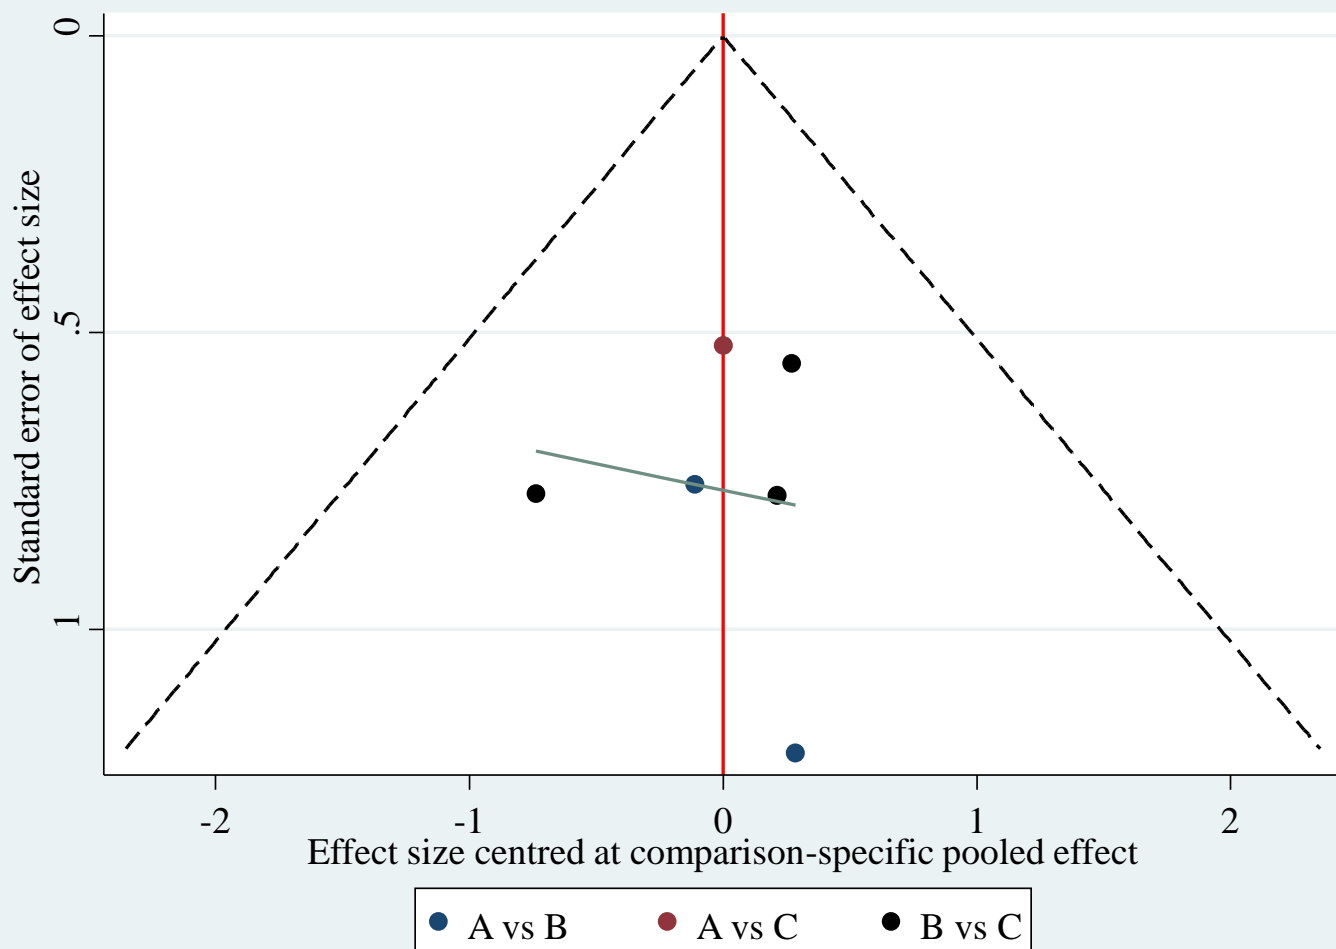

A, Placebo; B, Teriparatide; C, Bisphosphonate

Egger's test for small-study effects:

Regress standard normal deviate of intervention effect estimate against its standard error

Number of studies = 6

Root MSE = .5658

| Std_Eff | Coef.     | Std. Err. | t     | P> t  | [95% Conf. Interval] |
|---------|-----------|-----------|-------|-------|----------------------|
| slope   | .1841819  | .6350349  | 0.29  | 0.786 | -1.578958 1.947321   |
| bias    | -.2773287 | .9259605  | -0.30 | 0.779 | -2.848207 2.29355    |

Test of H0: no small-study effects

P = 0.779
